# Supplementary material for: The NGF R100W Mutation, Associated with Hereditary Sensory Autonomic Neuropathy Type V, Specifically Affects the Binding Energetic Landscapes of NGF and of Its Precursor proNGF and p75NTR
Source: MDPI journal article supplement (doi:10.3390/biology12030364), 2023-02-25

## Supplementary Materials and Methods

### Surface Plasmon Resonance (SPR)

SPR measurements were performed using a BIAcore 2000 instrument (BIAcore AB, Uppsala, Sweden). The extracellular domains of TrkA and p75NTR, expressed in baculovirus-infected insect cells as camel immunoadhesins [40 in main text], were immobilized on a CM5 sensor chip by cross-linking the amine groups according to the manufacturer's instructions, obtaining SPR signals, after completion of the chip regeneration cycle, of 8860 resonance units (RU) and of 4320 RU, respectively. The binding kinetics were determined by injection in PBS buffer with addition of 0.005% v/v Surfactant P20 of hNGF R100W (in the 4–500 nM concentration range) at a flow rate of 30  $\mu$ l/min. Data were analysed using the BIA evaluation 3.0 package (GE Healthcare) to yield the apparent equilibrium constant  $K_D$  (defined as the  $k_a/k_d$  ratio). The experiment was performed in triplicate.

Table S1: Details of NGF residues involved in the interface surface of the NGF/p75NTR complex (PDB\_ID 1SG1)

| NGF Chain: residue | Accessible Surface Area ASA( $\text{\AA}^2$ ) | Buried Surface Area BSA( $\text{\AA}^2$ ) ; Buried area percentage, one bar per 10% | Solvation energy effect $\Delta^iG$ (kcal/mol) | RMSF NGF WT ( $\text{\AA}$ ) | RMSF NGF R100W ( $\text{\AA}$ ) |
|--------------------|-----------------------------------------------|-------------------------------------------------------------------------------------|------------------------------------------------|------------------------------|---------------------------------|
| A:ASP 30           | 4.04                                          | 2.08                                                                                | -0.04                                          | 0.971                        | 1.081                           |
| A:ILE 31           | 87.78                                         | 46.67                                                                               | 0.75                                           | 0.958                        | 1.067                           |
| <b>A:LYS 32*</b>   | <b>176.25</b>                                 | <b>78.12      </b>                                                                  | <b>-0.82</b>                                   | <b>1.076</b>                 | <b>1.354</b>                    |
| A:LYS 34           | 88.67                                         | 2.34                                                                                | 0.04                                           | 1.219                        | 1.542                           |
| A:ASP 72           | 68.34                                         | 1.23                                                                                | -0.02                                          | 1.284                        | 1.347                           |
| A:HIS 75           | 88.29                                         | 37.20                                                                               | 0.22                                           | 1.191                        | 1.234                           |
| A:TRP 76           | 97.47                                         | 55.47                                                                               | 0.81                                           | 1.089                        | 1.11                            |
| A:PHE 86           | 79.04                                         | 1.25                                                                                | 0.02                                           | 0.925                        | 0.88                            |
| <b>A:LYS 88*</b>   | <b>110.11</b>                                 | <b>33.20     </b>                                                                   | <b>-0.54</b>                                   | <b>0.887</b>                 | <b>0.97</b>                     |
| A:ASP 93           | 44.17                                         | 9.84                                                                                | -0.13                                          | 1.713                        | 2.015                           |
| A:LYS 95           | 177.77                                        | 3.18                                                                                | 0.05                                           | 2.293                        | 2.795                           |
| <b>A:GLN 96*</b>   | <b>118.92</b>                                 | <b>78.68      </b>                                                                  | <b>-0.23</b>                                   | <b>1.628</b>                 | <b>2.168</b>                    |
| A:ALA 97           | 47.83                                         | 3.07                                                                                | -0.04                                          | 1.236                        | 1.652                           |
| A:ALA 98           | 34.30                                         | 26.10                                                                               | 0.42                                           | 1.09                         | 1.358                           |
| A:TRP 99           | 136.23                                        | 43.96                                                                               | 0.05                                           | 1.05                         | 1.134                           |
| A:ARG 100          | 65.43                                         | 58.0                                                                                | -1.33                                          | 0.939                        | 1.003                           |
| A:PHE 101          | 88.28                                         | 44.05                                                                               | 0.69                                           | 0.888                        | 0.927                           |
| A:ARG 114          | 191.36                                        | 113.17                                                                              | -1.52                                          | 1.735                        | 1.471                           |
| B:ARG 9            | 246.58                                        | 24.61                                                                               | 0.04                                           | 3.955                        | 2.216                           |
| B:GLY 10           | 67.81                                         | 30.55                                                                               | 0.26                                           | 2.278                        | 1.631                           |
| B:GLU 11           | 116.23                                        | 1.23                                                                                | -0.01                                          | 1.268                        | 1.321                           |
| B:PHE 12           | 173.89                                        | 86.14                                                                               | 1.38                                           | 0.812                        | 0.858                           |
| B:ASP 16           | 42.50                                         | 10.07                                                                               | 0.00                                           | 0.818                        | 0.916                           |
| B:SER 17           | 54.87                                         | 3.31                                                                                | -0.04                                          | 0.955                        | 0.945                           |
| B:VAL 18           | 75.58                                         | 32.13                                                                               | 0.51                                           | 0.871                        | 0.981                           |
| B:VAL 20           | 82.60                                         | 6.58                                                                                | 0.11                                           | 0.942                        | 1.051                           |
| <b>B:TRP 21*</b>   | <b>162.16</b>                                 | <b>81.48      </b>                                                                  | <b>0.80</b>                                    | <b>0.998</b>                 | <b>0.982</b>                    |
| B:SER 47           | 46.10                                         | 9.84                                                                                | 0.15                                           | 3.009                        | 2.6                             |
| B:VAL 48           | 102.73                                        | 40.44                                                                               | 0.25                                           | 2.289                        | 2.123                           |

|                  |               |                    |              |              |              |
|------------------|---------------|--------------------|--------------|--------------|--------------|
| B:PHE 49         | 112.90        | 54.09              | 0.87         | 1.641        | 1.546        |
| <b>B:LYS 50*</b> | <b>96.17</b>  | <b>42.05      </b> | <b>0.40</b>  | <b>1.115</b> | <b>1.202</b> |
| <b>B:TYR 52*</b> | <b>120.88</b> | <b>70.96      </b> | <b>0.54</b>  | <b>1.003</b> | <b>0.876</b> |
| <b>B:ARG 59*</b> | <b>154.55</b> | <b>44.36    </b>   | <b>-0.44</b> | <b>0.854</b> | <b>1.003</b> |
| <b>B:ARG 69*</b> | <b>120.95</b> | <b>75.10      </b> | <b>-0.68</b> | <b>0.847</b> | <b>0.937</b> |
| B:GLY 70         | 82.13         | 0.15               | -0.00        | 0.992        | 1.052        |

\*Residues involved in hydrogen bonds or salt bridges

Table S2: Details of p75NTR residues involved in the interface surface of the NGF/p75NTR complex (PDB\_ID 1SG1)

| P75NTR<br>Chain: residue | Accessible<br>Surface<br>Area<br>ASA(Å <sup>2</sup> ) | Buried Surface Area<br>BSA(Å <sup>2</sup> ) ; Buried area<br>percentage, one bar<br>per 10% | Solvation<br>energy<br>effect $\Delta^iG$<br>(kcal/mol) | RMSF<br>p75NTR<br>with NGF<br>WT (Å) | RMSF<br>p75 NTR<br>with NGF<br>R100W<br>(Å) |
|--------------------------|-------------------------------------------------------|---------------------------------------------------------------------------------------------|---------------------------------------------------------|--------------------------------------|---------------------------------------------|
| X:PRO 38                 | 87.55                                                 | 2.52                                                                                        | 0.04                                                    | 1.086                                | 1.354                                       |
| X:LEU 40                 | 113.34                                                | 22.93                                                                                       | 0.37                                                    | 0.94                                 | 1.303                                       |
| <b>X:ASP 41*</b>         | <b>87.70</b>                                          | <b>67.28      </b>                                                                          | <b>-0.05</b>                                            | <b>0.883</b>                         | <b>1.191</b>                                |
| <b>X:ASN 42 *</b>        | <b>104.49</b>                                         | <b>49.22      </b>                                                                          | <b>-0.20</b>                                            | <b>0.924</b>                         | <b>1.193</b>                                |
| X:MET 67                 | 108.01                                                | 57.99                                                                                       | 1.22                                                    | 1.124                                | 1.28                                        |
| <b>X:SER 68*</b>         | <b>44.34</b>                                          | <b>18.08      </b>                                                                          | <b>-0.07</b>                                            | <b>1.091</b>                         | <b>1.208</b>                                |
| X:ALA 69                 | 28.52                                                 | 0.17                                                                                        | 0.00                                                    | 0.989                                | 1.108                                       |
| X:PRO 70                 | 87.17                                                 | 48.74                                                                                       | 0.78                                                    | 0.924                                | 1.126                                       |
| X:CYS 71                 | 7.12                                                  | 1.75                                                                                        | -0.02                                                   | 0.82                                 | 1.189                                       |
| X:GLU 73                 | 70.96                                                 | 36.80                                                                                       | -0.30                                                   | 0.788                                | 1.214                                       |
| <b>X:TYR 83*</b>         | <b>169.58</b>                                         | <b>59.05      </b>                                                                          | <b>0.55</b>                                             | <b>1.175</b>                         | <b>1.462</b>                                |
| X:LEU 106                | 29.52                                                 | 21.13                                                                                       | 0.14                                                    | 1.366                                | 1.35                                        |
| X:VAL 107                | 60.33                                                 | 31.56                                                                                       | -0.07                                                   | 1.682                                | 1.69                                        |
| X:PHE 108                | 127.71                                                | 45.71                                                                                       | 0.73                                                    | 1.751                                | 1.669                                       |
| X:GLU 119                | 71.50                                                 | 0.25                                                                                        | -0.00                                                   | 1.608                                | 1.685                                       |
| <b>X:VAL 133*</b>        | <b>78.66</b>                                          | <b>50.11      </b>                                                                          | <b>0.48</b>                                             | <b>1.318</b>                         | <b>1.405</b>                                |
| <b>X:ASP 134*</b>        | <b>54.66</b>                                          | <b>14.49    </b>                                                                            | <b>-0.25</b>                                            | <b>0.861</b>                         | <b>1.273</b>                                |
| X:PRO 135                | 63.99                                                 | 49.08                                                                                       | 0.79                                                    | 0.908                                | 1.316                                       |
| X:LEU 137                | 81.35                                                 | 16.42                                                                                       | 0.26                                                    | 1.194                                | 1.659                                       |
| X:ASN 20                 | 72.79                                                 | 18.47                                                                                       | 0.15                                                    | 1.147                                | 1.752                                       |
| <b>X:LEU 21*</b>         | <b>104.99</b>                                         | <b>74.71      </b>                                                                          | <b>0.97</b>                                             | <b>1.066</b>                         | <b>1.486</b>                                |
| <b>X:ASP 41*</b>         | <b>87.70</b>                                          | <b>20.42    </b>                                                                            | <b>-0.20</b>                                            | <b>0.883</b>                         | <b>1.191</b>                                |
| X:VAL 49                 | 98.21                                                 | 16.24                                                                                       | 0.26                                                    | 1.265                                | 1.815                                       |
| X:SER 68                 | 44.34                                                 | 12.03                                                                                       | -0.14                                                   | 1.124                                | 1.28                                        |
| X:ALA 69                 | 28.52                                                 | 24.36                                                                                       | 0.39                                                    | 1.091                                | 1.208                                       |
| X:PRO 70                 | 87.17                                                 | 38.43                                                                                       | 0.59                                                    | 0.989                                | 1.108                                       |
| X:CYS 71                 | 7.12                                                  | 0.61                                                                                        | -0.01                                                   | 0.924                                | 1.126                                       |
| X:VAL 72                 | 72.30                                                 | 67.78                                                                                       | 1.08                                                    | 0.82                                 | 1.189                                       |
| X:GLU 73                 | 70.96                                                 | 19.53                                                                                       | -0.25                                                   | 0.804                                | 1.236                                       |
| X:ALA 74                 | 33.20                                                 | 30.50                                                                                       | 0.38                                                    | 0.788                                | 1.214                                       |
| <b>X:ASP 75*</b>         | <b>85.99</b>                                          | <b>61.47      </b>                                                                          | <b>-0.50</b>                                            | <b>0.85</b>                          | <b>1.275</b>                                |
| <b>X:ASP 76*</b>         | <b>43.30</b>                                          | <b>7.93   </b>                                                                              | <b>-0.00</b>                                            | <b>0.828</b>                         | <b>1.213</b>                                |
| X:VAL 78                 | 79.94                                                 | 29.04                                                                                       | 0.46                                                    | 0.993                                | 1.192                                       |
| X:LEU 106                | 29.52                                                 | 0.86                                                                                        | -0.01                                                   | 1.366                                | 1.35                                        |

|                   |              |                    |              |              |              |
|-------------------|--------------|--------------------|--------------|--------------|--------------|
| <b>X:GLU 119*</b> | <b>71.50</b> | <b>17.35    </b>   | <b>-0.20</b> | <b>1.608</b> | <b>1.685</b> |
| X:PRO 122         | 70.58        | 13.32              | 0.21         | 1.852        | 1.831        |
| X:THR 125         | 26.72        | 14.32              | 0.23         | 1.463        | 1.738        |
| X:PRO 135         | 63.99        | 14.91              | 0.24         | 0.908        | 1.316        |
| <b>X:CYS 136*</b> | <b>19.96</b> | <b>19.96      </b> | <b>-0.12</b> | <b>1.018</b> | <b>1.297</b> |
| X:LEU 137         | 81.35        | 11.22              | 0.18         | 1.194        | 1.659        |
| X:PRO 138         | 107.24       | 74.89              | 1.20         | 1.533        | 2.008        |
| X:CYS 139         | 34.40        | 5.41               | <b>-0.06</b> | 1.727        | 2.199        |
| X:VAL 141         | 133.59       | 0.49               | 0.01         | 2.506        | 3.188        |

\*Residues involved in hydrogen bonds or salt bridges

Table S3: Details of proNGF residues involved in the interface surface of the proNGF/2p75NTR complex (PDB\_ID 3IJ2)

| proNGF<br>Chain: residue | Accessible<br>Surface Area<br>ASA(Å <sup>2</sup> ) | Buried Surface Area<br>BSA(Å <sup>2</sup> ) ; Buried area<br>percentage, one bar<br>per 10% | Solvation<br>energy<br>effect Δ <sup>i</sup> G<br>(kcal/mol) | RMSF<br>proNGF<br>WT (Å) | RMSF<br>proNGF<br>R100W<br>(Å) |
|--------------------------|----------------------------------------------------|---------------------------------------------------------------------------------------------|--------------------------------------------------------------|--------------------------|--------------------------------|
| A:HIS 8                  | 143.87                                             | 16.35                                                                                       | <b>-0.11</b>                                                 | 2.18                     | 7.354                          |
| A:MET 9                  | 171.03                                             | 33.02                                                                                       | 0.01                                                         | 1.621                    | 4.724                          |
| A:GLY 10                 | 62.06                                              | 26.64                                                                                       | 0.22                                                         | 1.202                    | 2.224                          |
| A:GLU 11                 | 98.86                                              | 2.70                                                                                        | <b>-0.03</b>                                                 | 0.926                    | 1.276                          |
| A:PHE 12                 | 159.19                                             | 73.12                                                                                       | 1.17                                                         | 1.034                    | 1.073                          |
| A:ASP 16                 | 29.78                                              | 11.89                                                                                       | 0.03                                                         | 0.776                    | 0.909                          |
| A:SER 17                 | 57.57                                              | 0.74                                                                                        | <b>-0.01</b>                                                 | 0.865                    | 0.855                          |
| A:VAL 18                 | 91.42                                              | 40.88                                                                                       | 0.65                                                         | 0.861                    | 0.869                          |
| <b>A:TRP 21*</b>         | <b>157.06</b>                                      | <b>83.93      </b>                                                                          | <b>0.85</b>                                                  | <b>0.968</b>             | <b>0.99</b>                    |
| A:ASN 45                 | 125.57                                             | 5.62                                                                                        | 0.01                                                         | 4.097                    | 4.705                          |
| A:ASN 46                 | 156.75                                             | 0.47                                                                                        | 0.01                                                         | 3.641                    | 4.138                          |
| A:SER 47                 | 41.20                                              | 38.68                                                                                       | 0.62                                                         | 2.429                    | 2.851                          |
| A:VAL 48                 | 80.35                                              | 27.87                                                                                       | 0.40                                                         | 1.842                    | 2.045                          |
| A:PHE 49                 | 116.17                                             | 48.03                                                                                       | 0.40                                                         | 1.475                    | 1.734                          |
| A:ARG 50                 | 119.23                                             | 5.28                                                                                        | <b>-0.06</b>                                                 | 1.117                    | 1.14                           |
| <b>A:TYR 52*</b>         | <b>131.06</b>                                      | <b>75.25      </b>                                                                          | <b>0.75</b>                                                  | <b>0.941</b>             | <b>0.94</b>                    |
| <b>A:ARG 59*</b>         | <b>145.26</b>                                      | <b>46.46     </b>                                                                           | <b>0.12</b>                                                  | <b>0.841</b>             | <b>0.878</b>                   |
| A:PRO 63                 | 17.34                                              | 5.89                                                                                        | <b>-0.07</b>                                                 | 1.005                    | 1.292                          |
| A:VAL 64                 | 52.02                                              | 21.77                                                                                       | 0.35                                                         | 1.114                    | 1.468                          |
| A:GLU 65                 | 162.07                                             | 16.50                                                                                       | <b>-0.24</b>                                                 | 1.433                    | 1.466                          |
| <b>A:ARG 69*</b>         | <b>86.95</b>                                       | <b>63.47      </b>                                                                          | <b>-0.56</b>                                                 | <b>0.77</b>              | <b>1.06</b>                    |
| A:LYS 74                 | 149.74                                             | 6.87                                                                                        | 0.11                                                         | 1.157                    | 1.555                          |
| A:ILE 31                 | 77.91                                              | 43.75                                                                                       | 0.70                                                         | 0.976                    | 0.998                          |
| <b>A:LYS 32*</b>         | <b>172.24</b>                                      | <b>75.05      </b>                                                                          | <b>-0.66</b>                                                 | <b>1.135</b>             | <b>1.159</b>                   |
| A:LYS 34                 | 86.05                                              | 0.13                                                                                        | -0.00                                                        | 1.307                    | 1.52                           |
| A:ASP 72                 | 69.74                                              | 0.24                                                                                        | -0.00                                                        | 0.89                     | 1.194                          |
| A:LYS 74                 | 149.74                                             | 14.61                                                                                       | <b>-0.54</b>                                                 | 1.157                    | 1.555                          |
| A:HIS 75                 | 92.83                                              | 40.37                                                                                       | 0.16                                                         | 1.043                    | 1.413                          |
| A:TRP 76                 | 80.01                                              | 49.60                                                                                       | 0.65                                                         | 0.879                    | 1.184                          |
| <b>A:LYS 88*</b>         | <b>126.65</b>                                      | <b>37.89    </b>                                                                            | <b>-0.28</b>                                                 | <b>0.849</b>             | <b>0.852</b>                   |
| A:GLN 96                 | 117.54                                             | 62.13                                                                                       | 0.43                                                         | 2.103                    | 2.127                          |

|                   |               |                     |              |              |              |
|-------------------|---------------|---------------------|--------------|--------------|--------------|
| A:ALA 98          | 55.50         | 30.02               | 0.48         | 1.352        | 1.44         |
| A:TRP 99          | 152.05        | 38.31               | 0.06         | 1.128        | 1.189        |
| A:ARG 100         | 73.13         | 52.20               | -0.93        | 0.993        | 1.039        |
| A:PHE 101         | 82.24         | 43.00               | 0.69         | 0.862        | 0.887        |
| <b>A:ARG 114*</b> | <b>187.23</b> | <b>118.19      </b> | <b>-2.21</b> | <b>1.39</b>  | <b>1.399</b> |
| A:THR 117         | 189.41        | 7.07                | 0.10         | 5.041        | 3.516        |
| B:HIS 8           | 223.06        | 15.19               | 0.11         | 3.055        | 2.978        |
| B:MET 9           | 166.57        | 22.48               | -0.07        | 2.054        | 2.07         |
| B:GLY 10          | 53.15         | 29.02               | 0.08         | 1.48         | 1.601        |
| B:GLU 11          | 134.45        | 0.96                | -0.01        | 0.955        | 1.338        |
| B:PHE 12          | 164.58        | 78.75               | 1.26         | 0.803        | 1.031        |
| B:ASP 16          | 29.79         | 11.38               | 0.00         | 0.819        | 0.798        |
| B:SER 17          | 58.11         | 3.07                | -0.04        | 0.808        | 0.884        |
| B:VAL 18          | 91.54         | 45.83               | 0.73         | 0.88         | 0.914        |
| B:VAL 20          | 77.86         | 0.67                | 0.01         | 0.961        | 1.008        |
| <b>B:TRP 21*</b>  | <b>157.20</b> | <b>93.58      </b>  | <b>0.92</b>  | <b>0.941</b> | <b>0.939</b> |
| B:ASN 45          | 124.42        | 0.24                | -0.00        | 4.223        | 5.089        |
| B:SER 47          | 42.56         | 36.82               | 0.59         | 3.41         | 3.568        |
| B:VAL 48          | 79.81         | 25.52               | 0.36         | 2.43         | 2.203        |
| B:PHE 49          | 117.31        | 45.50               | 0.35         | 2.026        | 1.45         |
| B:ARG 50          | 120.68        | 3.31                | -0.04        | 1.38         | 1.002        |
| B:TYR 52          | 128.93        | 70.58               | 0.76         | 0.96         | 0.879        |
| B:PHE 54          | 95.90         | 0.31                | 0.00         | 0.813        | 0.828        |
| <b>B:ARG 59*</b>  | <b>143.76</b> | <b>45.33    </b>    | <b>0.08</b>  | <b>0.899</b> | <b>0.871</b> |
| B:PRO 63          | 16.84         | 7.23                | -0.08        | 0.879        | 1.019        |
| B:VAL 64          | 52.95         | 22.90               | 0.37         | 0.948        | 1.2          |
| B:GLU 65          | 162.46        | 24.27               | -0.33        | 1.205        | 1.59         |
| <b>B:ARG 69*</b>  | <b>87.15</b>  | <b>65.58      </b>  | <b>-0.58</b> | <b>0.718</b> | <b>0.922</b> |
| B:GLY 70          | 74.38         | 0.14                | -0.00        | 0.82         | 1.01         |
| B:ILE 31          | 77.95         | 41.24               | 0.66         | 0.968        | 0.961        |
| B:LYS 32          | 172.11        | 69.62               | -0.63        | 1.122        | 1.128        |
| B:LYS 34          | 86.57         | 0.53                | -0.02        | 1.26         | 1.219        |
| B:ASP 72          | 70.94         | 0.32                | -0.01        | 0.877        | 1.121        |
| B:LYS 74          | 150.84        | 8.95                | -0.33        | 1.139        | 1.419        |
| B:HIS 75          | 93.50         | 36.24               | 0.14         | 1.008        | 1.358        |
| B:TRP 76          | 81.71         | 49.42               | 0.62         | 0.889        | 1.104        |
| <b>B:LYS 88*</b>  | <b>128.28</b> | <b>40.17    </b>    | <b>-0.37</b> | <b>0.867</b> | <b>0.895</b> |
| B:GLN 96          | 117.33        | 74.81               | 0.53         | 1.916        | 1.864        |
| B:ALA 98          | 56.29         | 36.23               | 0.58         | 1.245        | 1.228        |
| B:TRP 99          | 153.54        | 38.62               | 0.08         | 1.084        | 1.017        |
| <b>B:ARG 100*</b> | <b>73.16</b>  | <b>53.41      </b>  | <b>-1.03</b> | <b>0.948</b> | <b>0.907</b> |
| B:PHE 101         | 83.50         | 43.01               | 0.69         | 0.869        | 0.844        |
| <b>B:ARG 114*</b> | <b>186.97</b> | <b>121.28      </b> | <b>-2.15</b> | <b>0.973</b> | <b>1.3</b>   |
| B:THR 117         | 187.35        | 11.54               | 0.05         | 4.443        | 3.927        |

\*Residues involved in hydrogen bonds or salt bridges

Table S4: Details of p75NTR residues involved in the interface surface of the proNGF/2p75NTR complex (PDB\_ID 3IJ2)

| P75NTR<br>Chain: residue | Accessible<br>Surface<br>Area<br>ASA(Å <sup>2</sup> ) | Buried Surface Area<br>BSA(Å <sup>2</sup> ) ; Buried area<br>percentage, one bar<br>per 10% | Solvation<br>energy<br>effect $\Delta^iG$<br>(kcal/mol) | RMSF<br>p75NTR<br>with<br>proNGF WT | RMSF<br>p75NTR with<br>proNGF<br>R100W |
|--------------------------|-------------------------------------------------------|---------------------------------------------------------------------------------------------|---------------------------------------------------------|-------------------------------------|----------------------------------------|
| X:LEU 40                 | 115.69                                                | 47.53                                                                                       | 0.76                                                    | 1.85                                | 1.558                                  |
| X:ASP 41                 | 73.15                                                 | 11.96                                                                                       | 0.05                                                    | 1.949                               | 1.571                                  |
| X:SER 42                 | 83.50                                                 | 70.13                                                                                       | -0.00                                                   | 1.528                               | 1.478                                  |
| X:VAL 43                 | 71.57                                                 | 28.28                                                                                       | 0.45                                                    | 1.647                               | 1.478                                  |
| X:MET 67                 | 112.29                                                | 64.76                                                                                       | 1.23                                                    | 1.076                               | 1.081                                  |
| <b>X:SER 68*</b>         | <b>59.12</b>                                          | <b>17.73    </b>                                                                            | <b>-0.17</b>                                            | <b>1.067</b>                        | <b>1.049</b>                           |
| X:PRO 70                 | 84.14                                                 | 45.63                                                                                       | 0.73                                                    | 0.993                               | 0.963                                  |
| X:CYS 71                 | 9.86                                                  | 3.71                                                                                        | -0.03                                                   | 0.992                               | 0.973                                  |
| X:TYR 83                 | 178.10                                                | 51.09                                                                                       | 0.50                                                    | 1.157                               | 1.396                                  |
| X:LEU 106                | 24.93                                                 | 13.71                                                                                       | 0.09                                                    | 1.154                               | 1.385                                  |
| X:VAL 107                | 62.56                                                 | 32.98                                                                                       | -0.08                                                   | 1.239                               | 1.63                                   |
| X:PHE 108                | 127.82                                                | 54.14                                                                                       | 0.87                                                    | 1.285                               | 1.634                                  |
| X:ASP 128                | 92.52                                                 | 22.54                                                                                       | -0.26                                                   | 1.861                               | 1.868                                  |
| X:GLU 129                | 89.11                                                 | 5.28                                                                                        | -0.09                                                   | 1.605                               | 1.706                                  |
| X:ASN 131                | 33.30                                                 | 1.74                                                                                        | -0.02                                                   | 1.291                               | 1.324                                  |
| <b>X:VAL 133*</b>        | <b>79.03</b>                                          | <b>57.99          </b>                                                                      | <b>0.57</b>                                             | <b>1.047</b>                        | <b>1.151</b>                           |
| <b>X:ASP 134*</b>        | <b>57.38</b>                                          | <b>33.89        </b>                                                                        | <b>-0.21</b>                                            | <b>1.162</b>                        | <b>1.106</b>                           |
| X:PRO 135                | 64.73                                                 | 47.14                                                                                       | 0.75                                                    | 1.159                               | 1.261                                  |
| X:LEU 137                | 82.44                                                 | 37.32                                                                                       | 0.60                                                    | 1.841                               | 1.476                                  |
| X:ASN 20                 | 66.45                                                 | 25.67                                                                                       | -0.01                                                   | 2.149                               | 2.059                                  |
| X:LEU 21                 | 91.88                                                 | 39.88                                                                                       | 0.41                                                    | 1.931                               | 1.961                                  |
| X:GLY 22                 | 7.71                                                  | 2.01                                                                                        | 0.03                                                    | 1.671                               | 1.717                                  |
| <b>X:ASP 41*</b>         | <b>73.15</b>                                          | <b>33.55        </b>                                                                        | <b>-0.54</b>                                            | <b>1.949</b>                        | <b>1.571</b>                           |
| X:VAL 49                 | 85.98                                                 | 4.43                                                                                        | 0.07                                                    | 2.075                               | 2.723                                  |
| X:SER 68                 | 59.12                                                 | 8.13                                                                                        | -0.09                                                   | 1.067                               | 1.049                                  |
| X:ALA 69                 | 38.22                                                 | 30.19                                                                                       | 0.48                                                    | 0.976                               | 0.972                                  |
| X:PRO 70                 | 84.14                                                 | 38.51                                                                                       | 0.62                                                    | 0.993                               | 0.963                                  |
| X:VAL 72                 | 64.99                                                 | 55.12                                                                                       | 0.88                                                    | 1.098                               | 1.223                                  |
| X:GLU 73                 | 46.49                                                 | 23.85                                                                                       | -0.25                                                   | 1.143                               | 1.475                                  |
| X:ALA 74                 | 56.24                                                 | 51.85                                                                                       | 0.79                                                    | 1.167                               | 1.181                                  |
| <b>X:ASP 75 *</b>        | <b>88.69</b>                                          | <b>51.64        </b>                                                                        | <b>-0.29</b>                                            | <b>1.057</b>                        | <b>1.025</b>                           |
| X:ASP 76                 | 28.44                                                 | 1.60                                                                                        | -0.02                                                   | 0.949                               | 0.914                                  |
| X:VAL 78                 | 77.67                                                 | 18.74                                                                                       | 0.30                                                    | 1.004                               | 0.968                                  |
| X:LEU 106                | 24.93                                                 | 3.07                                                                                        | -0.04                                                   | 1.154                               | 1.385                                  |
| X:VAL 107                | 62.56                                                 | 1.17                                                                                        | 0.02                                                    | 1.239                               | 1.63                                   |
| <b>X:GLU 119*</b>        | <b>75.22</b>                                          | <b>12.25   </b>                                                                             | <b>-0.15</b>                                            | <b>1.328</b>                        | <b>1.781</b>                           |
| X:PRO 122                | 65.91                                                 | 8.51                                                                                        | 0.14                                                    | 1.573                               | 1.885                                  |
| X:GLU 123                | 173.33                                                | 7.62                                                                                        | 0.01                                                    | 1.782                               | 2.004                                  |
| X:THR 125                | 24.20                                                 | 9.54                                                                                        | 0.15                                                    | 1.549                               | 1.585                                  |
| X:PRO 135                | 64.73                                                 | 17.58                                                                                       | 0.28                                                    | 1.159                               | 1.261                                  |
| X:CYS 136                | 23.72                                                 | 23.55                                                                                       | -0.07                                                   | 1.315                               | 1.335                                  |
| X:LEU 137                | 82.44                                                 | 12.27                                                                                       | 0.20                                                    | 1.841                               | 1.476                                  |
| X:PRO 138                | 103.34                                                | 68.86                                                                                       | 1.10                                                    | 2.006                               | 1.753                                  |

|                   |              |                    |              |              |              |
|-------------------|--------------|--------------------|--------------|--------------|--------------|
| X:CYS 139         | 25.16        | 6.06               | -0.07        | 1.98         | 1.863        |
| X:VAL 141         | 133.07       | 15.55              | 0.25         | 2.823        | 2.668        |
| Y:LEU 40          | 115.14       | 51.02              | 0.82         | 1.349        | 1.269        |
| Y:ASP 41          | 74.01        | 23.20              | 0.13         | 1.341        | 1.108        |
| <b>Y:SER 42*</b>  | <b>83.54</b> | <b>69.63      </b> | <b>-0.11</b> | <b>1.255</b> | <b>1.049</b> |
| Y:VAL 43          | 72.45        | 27.46              | 0.44         | 1.11         | 1.12         |
| Y:MET 67          | 111.21       | 60.70              | 1.09         | 0.963        | 1.052        |
| <b>Y:SER 68*</b>  | <b>57.55</b> | <b>21.75     </b>  | <b>-0.20</b> | <b>1.009</b> | <b>1.063</b> |
| Y:ALA 69          | 36.96        | 0.33               | 0.01         | 0.941        | 0.939        |
| Y:PRO 70          | 84.61        | 49.22              | 0.79         | 0.935        | 0.895        |
| Y:CYS 71          | 10.04        | 4.69               | -0.04        | 0.908        | 0.851        |
| Y:TYR 83          | 181.00       | 44.16              | 0.41         | 1.228        | 1.269        |
| Y:LEU 106         | 26.23        | 12.47              | 0.06         | 1.149        | 1.102        |
| Y:VAL 107         | 64.08        | 37.99              | 0.00         | 1.251        | 1.299        |
| Y:PHE 108         | 127.37       | 54.25              | 0.87         | 1.32         | 1.376        |
| Y:GLN 111         | 81.32        | 6.26               | -0.07        | 1.479        | 1.441        |
| Y:ASP 128         | 95.40        | 17.66              | -0.22        | 1.789        | 1.935        |
| Y:ASN 131         | 33.27        | 0.58               | -0.01        | 1.209        | 1.302        |
| <b>Y:VAL 133*</b> | <b>79.16</b> | <b>52.16      </b> | <b>0.52</b>  | <b>1.281</b> | <b>1.069</b> |
| <b>Y:ASP 134*</b> | <b>58.57</b> | <b>32.38      </b> | <b>-0.17</b> | <b>1.281</b> | <b>1.111</b> |
| Y:PRO 135         | 64.39        | 50.41              | 0.81         | 1.24         | 1.047        |
| Y:LEU 137         | 83.73        | 44.34              | 0.71         | 1.572        | 1.514        |
| Y:GLU 143         | 128.67       | 7.36               | -0.12        | 3.925        | 3.973        |
| Y:ASN 20          | 66.72        | 19.54              | 0.09         | 1.884        | 1.932        |
| Y:LEU 21          | 91.60        | 50.77              | 0.59         | 1.599        | 1.526        |
| Y:GLY 22          | 8.10         | 1.68               | 0.03         | 1.417        | 1.289        |
| <b>Y:ASP 41*</b>  | <b>74.01</b> | <b>25.48     </b>  | <b>-0.42</b> | <b>1.341</b> | <b>1.108</b> |
| Y:VAL 49          | 86.54        | 11.46              | 0.18         | 1.907        | 1.925        |
| Y:SER 68          | 57.55        | 9.51               | -0.10        | 1.009        | 1.063        |
| Y:ALA 69          | 36.96        | 30.43              | 0.49         | 0.941        | 0.939        |
| Y:PRO 70          | 84.61        | 35.38              | 0.56         | 0.935        | 0.895        |
| Y:VAL 72          | 64.60        | 57.07              | 0.91         | 0.908        | 0.851        |
| Y:GLU 73          | 46.70        | 19.27              | -0.25        | 1.112        | 0.885        |
| Y:ALA 74          | 56.11        | 53.65              | 0.74         | 1.235        | 1            |
| <b>Y:ASP 75*</b>  | <b>88.89</b> | <b>53.91      </b> | <b>-0.36</b> | <b>1.221</b> | <b>0.948</b> |
| Y:ASP 76          | 28.46        | 1.10               | -0.01        | 1.069        | 0.874        |
| Y:VAL 78          | 77.57        | 23.58              | 0.38         | 0.916        | 0.99         |
| Y:LEU 106         | 26.23        | 3.07               | -0.04        | 1.149        | 1.102        |
| Y:VAL 107         | 64.08        | 1.00               | 0.02         | 1.251        | 1.299        |
| <b>Y:GLU 119*</b> | <b>74.32</b> | <b>12.12   </b>    | <b>-0.15</b> | <b>1.292</b> | <b>1.429</b> |
| Y:PRO 122         | 65.91        | 8.34               | 0.13         | 1.623        | 1.774        |
| Y:GLU 123         | 173.97       | 12.69              | 0.14         | 1.879        | 1.956        |
| Y:THR 125         | 24.05        | 11.21              | 0.18         | 1.591        | 1.463        |
| Y:PRO 135         | 64.39        | 13.97              | 0.22         | 1.24         | 1.047        |
| <b>Y:CYS 136*</b> | <b>23.69</b> | <b>23.69      </b> | <b>-0.06</b> | <b>1.314</b> | <b>1.152</b> |
| Y:LEU 137         | 83.73        | 10.63              | 0.17         | 1.572        | 1.514        |
| Y:PRO 138         | 101.25       | 65.49              | 1.05         | 1.826        | 1.77         |
| Y:CYS 139         | 25.09        | 4.40               | -0.05        | 1.986        | 1.831        |
| Y:VAL 141         | 136.11       | 13.05              | 0.21         | 2.778        | 2.647        |

\*Residues involved in hydrogen bonds or salt bridges.

Figure S1: Plots of Root-Mean-Square Fluctuation of the backbone of the two chains of unbound NGF: (a) NGF\_A WT and R100W, (b) NGF\_B WT and R100W.

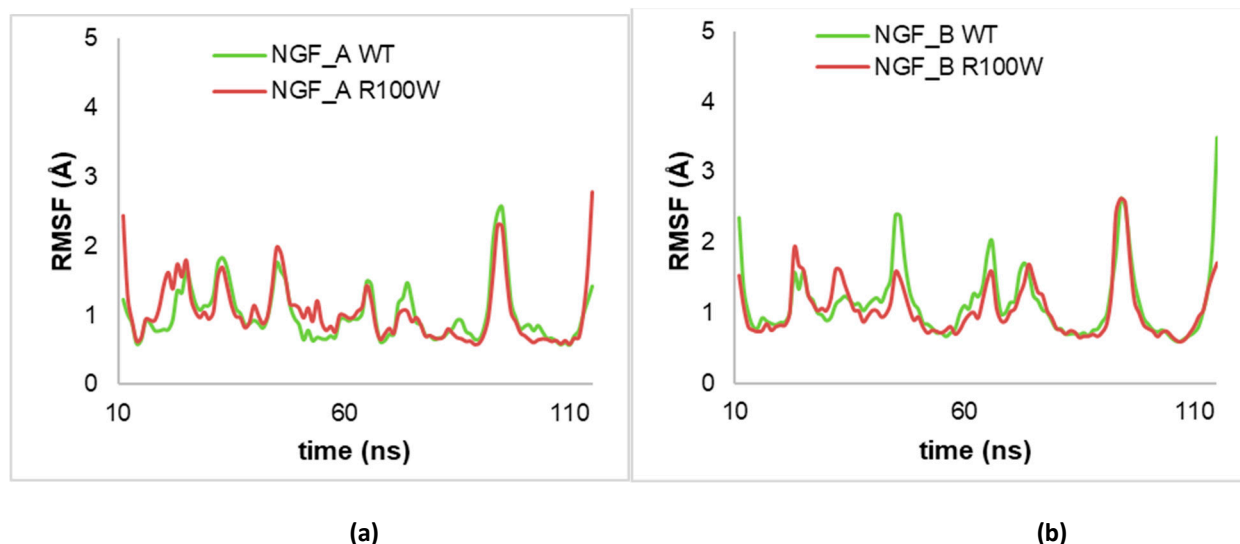

Figure S2: Plots of Root-Mean-Square Fluctuation of the backbone of the two chains of unbound proNGF: (a) proNGF\_A WT and R100W, (b) proNGF\_B WT and R100W.

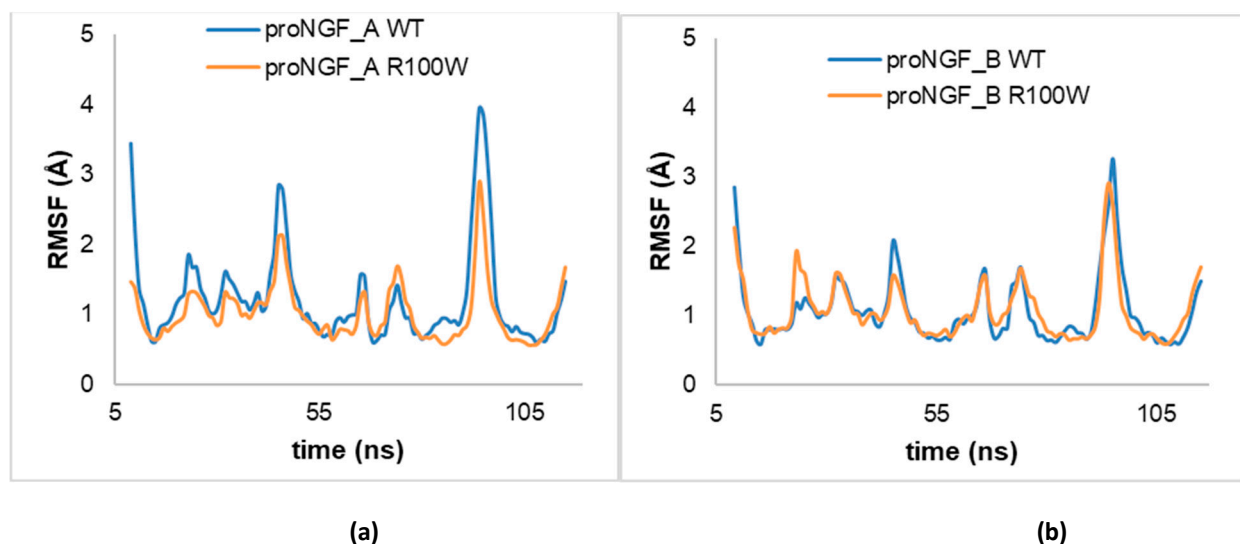

Figure S3: Root Mean-Square Deviations plots of: (a) NGF and (b) proNGF in complex with p75NTR.

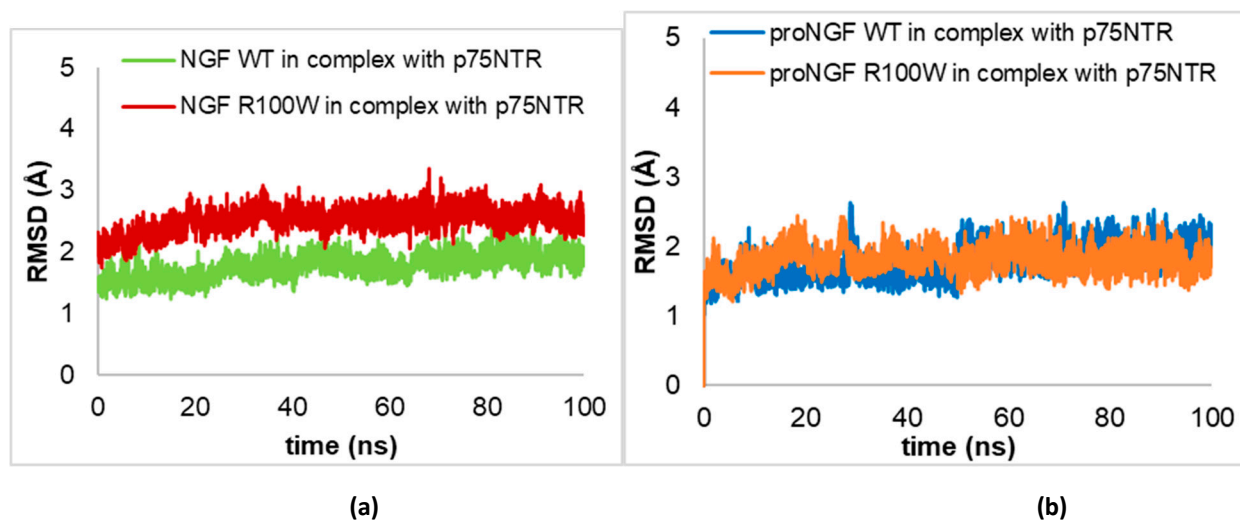



Figure S4: Root Mean-Square Deviations plots of the complexes: p75NTR in complex with NGF (a), p75NTR\_X (b) and p75NTR\_Y (c) in complex with proNGF.

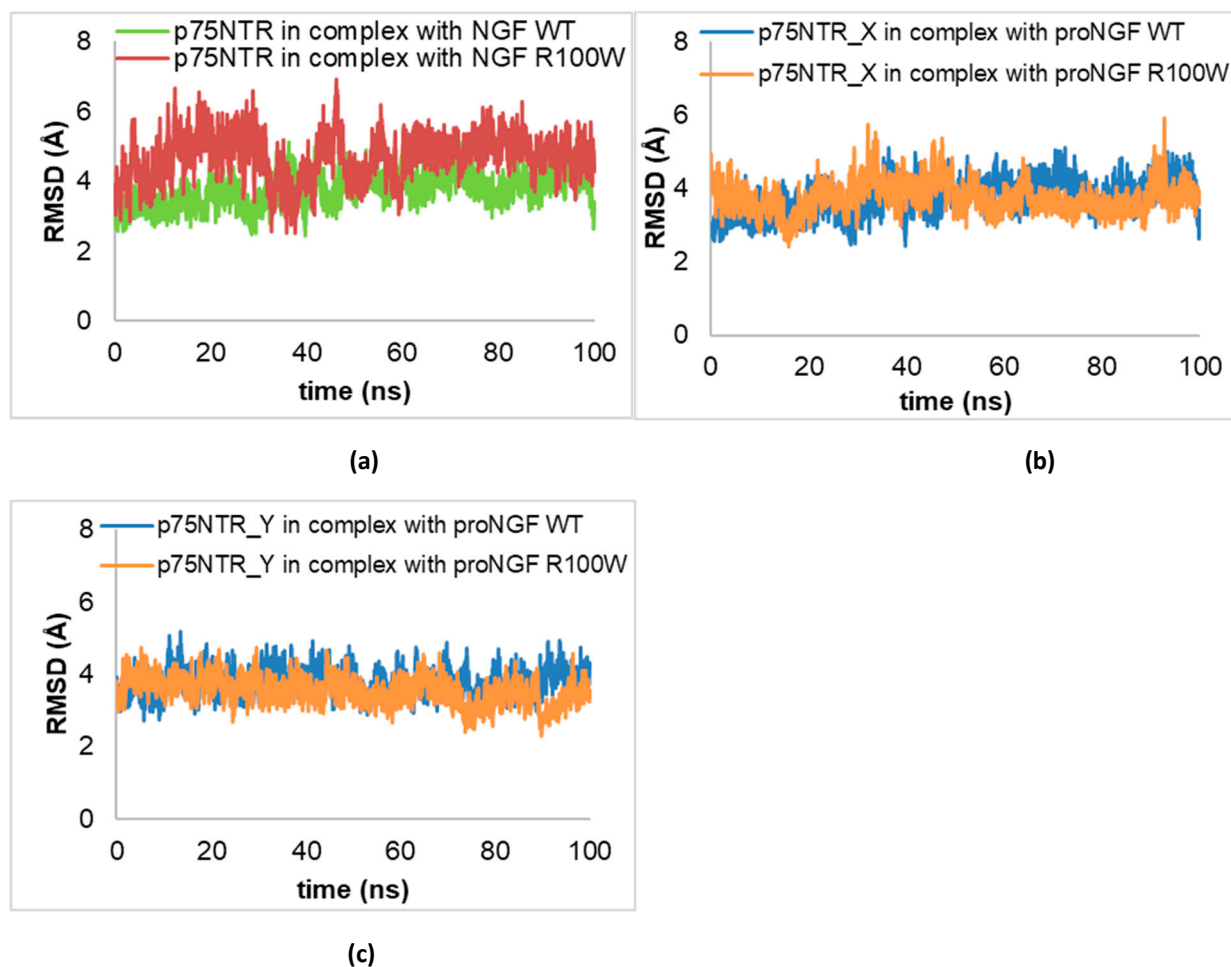

Figure S5: SPR analysis of hNGF R100W binding to NGF receptors: A) binding of 1.7–15 nM hNGF R100W to TrkA (immobilized at 8860 RU) and B) to p75NTR (immobilized at 4320 RU). All curves were blank subtracted.

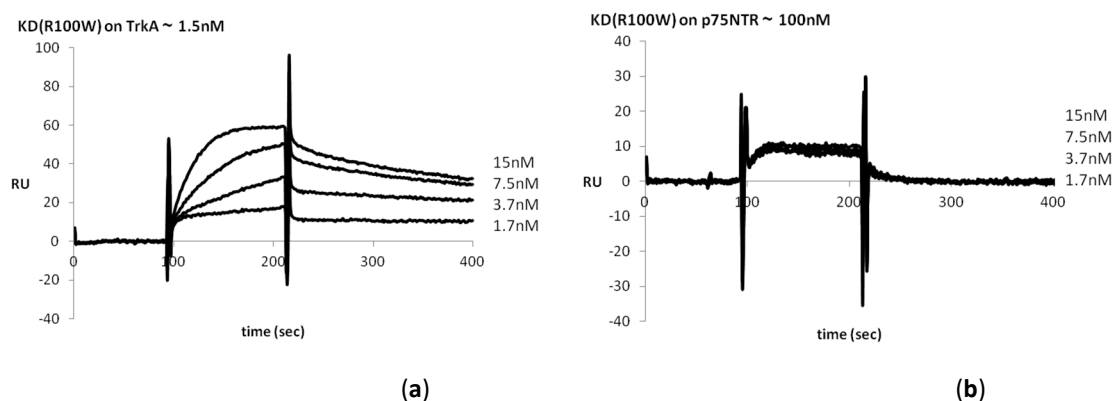

Supplement: s1 [file s1]
